# Supplementary material for: Influence of age on radiomic features in 18F-FDG PET in normal breast tissue and in breast cancer tumors
Source: PubMed Central journal article supplement (PMC6089391; doi:10.18632/oncotarget.25762), 2018-07-20
Supplement: oncotarget-09-30855-s001.pdf [file oncotarget-09-30855-s001.pdf]

## Influence of age on radiomic features in <sup>18</sup>F-FDG PET in normal breast tissue and in breast cancer tumors

### SUPPLEMENTARY MATERIALS

**Supplementary Table 1: Table extracted from Orlhac F, Soussan M, Maisonobe JA, Garcia CA, Vanderlinden B, Buvat I**

| List of indices calculated from texture matrices |               |
|--------------------------------------------------|---------------|
| Matrix                                           | Index         |
| Cooccurrence Matrix                              | Homogeneity   |
|                                                  | Energy        |
|                                                  | Correlation   |
|                                                  | Contrast      |
|                                                  | Entropy       |
|                                                  | Dissimilarity |
| Gray-Level Run Length Matrix                     | SRE           |
|                                                  | LRE           |
|                                                  | LGRE          |
|                                                  | HGRE          |
|                                                  | SRLGE         |
|                                                  | SRHGE         |
|                                                  | LRLGE         |
|                                                  | LRHGE         |
|                                                  | GLNUr         |
|                                                  | RLNU          |
| RP                                               |               |
| Neighborhood Gray-Level Different Matrix         | Coarseness    |
|                                                  | Contrast      |
|                                                  | Busyness      |
| Gray-Level Zone Length Matrix                    | SZE           |
|                                                  | LZE           |
|                                                  | LGZE          |
|                                                  | HGZE          |
|                                                  | SZLGE         |
|                                                  | SZHGE         |
|                                                  | LZLGE         |
|                                                  | LZHGE         |
|                                                  | GLNUz         |
|                                                  | ZLNU          |
| ZP                                               |               |

SRE = short-run emphasis; LRE = long-run emphasis; LGRE = low grey-level run emphasis; HGRE = high grey-level run emphasis; SRLGE = short-run low grey-level emphasis; SRHGE = short-run high grey-level emphasis; LRLGE = long-run low grey-level emphasis; LRHGE = long-run high grey-level emphasis; GLNUr = grey-level non-uniformity for run, RLNU = run-length non-uniformity; RP = run percentage; SZE = short-zone emphasis; LZE = long-zone emphasis; LGZE = low grey-level zone emphasis; HGZE = high grey-level zone emphasis; SZLGE = short-zone low grey-level emphasis; SZHGE = short-zone high grey-level emphasis; LZLGE = long-zone low grey-level emphasis; LZHGE = long-zone high grey-level emphasis; GLNUz = grey-level non-uniformity for zone; ZLNU = zone length non-uniformity; ZP = zone percentage. Tumor texture analysis in <sup>18</sup>F-FDG PET: relationships between texture parameters, histogram indices, standardized uptake values, metabolic volumes, and total lesion glycolysis. *Journal of Nuclear Medicine*. 2014; 55:414–22.

**Supplementary Table 2: Mean and SD values for SUVs, HBI and TI in each age group PRE, PERI and POST for B-VOI, M-VOI and F-VOI; \* $p$  value < 0.05 and \*\* $p$  value < 0.01. See Supplementary\_Table\_2**

**Supplementary Table 3: Evolution of Mean and SD values for SUVs, HBI and TI between PRE and PERI groups: PRE/PERI, PRE and POST groups: PRE/POST and PERI and POST groups: PERI/POST for B-VOI, M-VOI and F-VOI; Hochberg test: ↘, ↘↘ and ↗, ↗↗ correspond to an increase or decrease with  $p$  value respectively < 0.05 and < 0.01 and - no significant difference. See Supplementary\_Table\_3**

**Supplementary Table 4: Spearman correlation coefficients between age and breast, muscle and fat tissues respectively;**  
 $*p < 0.05$  and  $0.3 < |R| \leq 0.5$

|               | <b>Breast</b> | <b>Muscle</b> | <b>Fat</b> |
|---------------|---------------|---------------|------------|
| SUVmean       | -0.42*        | -0.35*        | 0.31       |
| SUVmax        | -0.41*        | -0.34*        | 0.24       |
| SUVpeak       | -0.42*        | -0.38*        | 0.29       |
| SkewnessH     | 0.18          | -0.01         | -0.04      |
| KurtosisH     | 0.10          | 0.03          | -0.02      |
| EntropyH      | -0.05         | 0.02          | 0.12       |
| EnergyH       | 0.04          | -0.08         | -0.12      |
| Homogeneity   | 0.36*         | -0.25         | 0.14       |
| Energy        | 0.33*         | -0.25         | 0.12       |
| Contrast      | -0.36*        | 0.24          | -0.14      |
| Correlation   | -0.19         | 0.16          | -0.02      |
| Entropy       | -0.34*        | 0.27          | -0.12      |
| Dissimilarity | -0.36*        | 0.25          | -0.14      |
| SRE           | -0.39*        | 0.22          | -0.18      |
| LRE           | 0.38*         | -0.25         | 0.20       |
| LGRE          | 0.44*         | -0.35*        | -0.21      |
| HGRE          | -0.44*        | 0.35*         | 0.19       |
| SRLGE         | 0.34*         | -0.23         | -0.27      |
| SRHGE         | -0.44*        | 0.34*         | -0.06      |
| LRLGE         | 0.44*         | -0.39         | 0.17       |
| LRHGE         | -0.36*        | 0.08          | 0.28       |
| GLNU          | 0.17          | 0.05          | 0.02       |
| RLNU          | -0.38*        | 0.20          | -0.04      |
| RP            | -0.38*        | 0.24          | -0.20      |
| Coarseness    | 0.05          | -0.16         | 0.21       |
| Contrast_2    | -0.19         | 0.12          | 0.06       |
| Busyness      | -0.01         | -0.09         | 0.13       |
| SZE           | -0.07         | 0.04          | -0.04      |
| LZE           | 0.35*         | -0.12         | 0.13       |
| LGZE          | 0.29          | -0.28         | -0.21      |
| HGZE          | -0.39*        | 0.31*         | 0.21       |
| SZLGE         | -0.01         | -0.11         | -0.08      |
| SZHGE         | -0.20         | 0.16          | 0.01       |
| LZLGE         | 0.42*         | -0.26         | 0.11       |
| LZHGE         | -0.13         | 0.19          | 0.17       |
| GLNU_2        | -0.16         | -0.10         | -0.05      |
| ZNLU          | -0.15         | 0.02          | 0.04       |
| ZP            | -0.25         | -0.02         | -0.16      |

**Supplementary Table 5: *p*-values of Anova tests comparing PET parameters between the 3 age groups (PRE, PERI and POST) according to BC histological type, subtype and for all BC tumors; \**p* < 0.05 and \*\**p* < 0.1. See Supplementary\_Table\_5**

**Supplementary Table 6: Spearman correlation coefficients between PET parameters and AGE according to BC histological type, subtype and for all BC tumors; \**p* < 0.05. See Supplementary\_Table\_6**

**Supplementary Table 7: *p* values obtained on multivariate (MV) analysis comparing RF in TN tumors according to Ki-67 expression ( $\leq 30\%$  vs  $>30\%$ ), the presence of tumor necrosis, in situ carcinoma and tumor grade grade (Grade I + II vs III); \**p* < 0.05 and \*\* additional *p* < 0.05 when age is used as a co-variable in MV analysis. See Supplementary\_Table\_7**
